# Supplementary material
Source: PubMed Central journal article supplement (PMC4136080)
Supplement: AEM.01370-14_zam999105610so1.pdf [file AEM.01370-14_zam999105610so1.pdf]

1 **Supplementary table S1:** Summary of transcriptome comparison of *S. pneumoniae* strain  
2 D39 wild-type grown in LM17 (0.5% Lactose + M17) and GM17 (0.5% Glucose + M17).  
3 <sup>a</sup>Gene numbers refer to D39 locus tags. <sup>b</sup>D39 annotation/TIGR4 annotation (1-3), <sup>c</sup>Ratio  
4 represents the fold increase/decrease in the expression of genes in LM17 as compared to  
5 GM17.

| <b>D39 tag<sup>a</sup></b> | <b>Function<sup>b</sup></b>                  | <b>Ratio<sup>c</sup></b> | <b>Predicted CcpA site</b>           |
|----------------------------|----------------------------------------------|--------------------------|--------------------------------------|
| <i>SPD_0088</i>            | ABC transporter, permease protein            | 2.0                      | ATGTAATCGTTATCAA                     |
| <i>SPD_0265</i>            | Alcohol dehydrogenase, zinc-containing       | 6.9                      | TGGAAAAGGCTTTCTT                     |
| <i>SPD_0277</i>            | 6-phospho-beta-glucosidase                   | 8.5                      | AAGAATGCGTTTTTCAT                    |
| <i>SPD_0279</i>            | PTS system, IIB component                    | 1.8                      |                                      |
| <i>SPD_0420</i>            | Formate acetyltransferase                    | 1.9                      | TTGAAATCGGTTACTA                     |
| <i>SPD_0559</i>            | PTS system IIA component, putative           | 2.5                      | TTGACAACGGTTTTTCAT                   |
| <i>SPD_0560</i>            | PTS system, IIB component, putative          | 4.5                      |                                      |
| <i>SPD_0561</i>            | PTS system, IIC component, putative          | 3.3                      |                                      |
| <i>SPD_0580</i>            | Glucokinase                                  | 1.9                      | CTGTAAGCATTTTCAA                     |
| <i>SPD_0621</i>            | Lactate oxidase                              | 1.7                      | AAGCAAACGCTTACTT                     |
| <i>SPD_1012</i>            | Phosphopyruvate hydratase                    | 3.1                      | AAGTAATCGCTTTCTT                     |
| <i>SPD_1300</i>            | Thiamine biosynthesis protein ApbE, putative | 2.8                      | ATGTAAGGGCTTCAAT                     |
| <i>SPD_1635</i>            | Galactose operon repressor                   | 2.2                      | AAGAAAACGATTACAC                     |
| <i>SPD_1634</i>            | Galactokinase                                | 1.9                      |                                      |
| <i>SPD_1797</i>            | Catabolite control protein A                 | -1.5                     | TTGAAAGTGTTTACAA                     |
| <i>SPD_1834</i>            | Alcohol dehydrogenase, iron-containing       | 7.1                      | AATAATGCGTTATAAT<br>ATGAAACTGTTTACAA |
| <i>SPD_1933</i>            | 4-alpha-glucanotransferase                   | 2.0                      | TTAAAAACGCTTGCAA                     |

1 **References**

- 2 1. **Hoskins J, Alborn WE,Jr., Arnold J, Blaszcak LC, Burgett S, DeHoff BS, Estrem ST,**  
3 **Fritz L, Fu DJ, Fuller W, Geringer C, Gilmour R, Glass JS, Khoja H, Kraft AR, Lagace**  
4 **RE, LeBlanc DJ, Lee LN, Lefkowitz EJ, Lu J, Matsushima P, McAhren SM, McHenney**  
5 **M, McLeaster K, Mundy CW, Nicas TI, Norris FH, O'Gara M, Peery RB, Robertson**  
6 **GT, Rockey P, Sun PM, Winkler ME, Yang Y, Young-Bellido M, Zhao G, Zook CA,**  
7 **Baltz RH, Jaskunas SR, Rosteck PR,Jr., Skatrud PL, Glass JI.** 2001. Genome of the  
8 bacterium *Streptococcus pneumoniae* strain R6. *J. Bacteriol.* **183**:5709-5717.
- 9 2. **Lanie JA, Ng WL, Kazmierczak KM, Andrzejewski TM, Davidsen TM, Wayne KJ,**  
10 **Tettelin H, Glass JI, Winkler ME.** 2007. Genome sequence of Avery's virulent serotype 2  
11 strain D39 of *Streptococcus pneumoniae* and comparison with that of unencapsulated  
12 laboratory strain R6. *J. Bacteriol.* **189**:38-51.
- 13 3. **Tettelin H, Nelson KE, Paulsen IT, Eisen JA, Read TD, Peterson S, Heidelberg J,**  
14 **DeBoy RT, Haft DH, Dodson RJ, Durkin AS, Gwinn M, Kolonay JF, Nelson WC,**  
15 **Peterson JD, Umayam LA, White O, Salzberg SL, Lewis MR, Radune D, Holtzapple E,**  
16 **Khouri H, Wolf AM, Utterback TR, Hansen CL, McDonald LA, Feldblyum TV,**  
17 **Angiuoli S, Dickinson T, Hickey EK, Holt IE, Loftus BJ, Yang F, Smith HO, Venter JC,**  
18 **Dougherty BA, Morrison DA, Hollingshead SK, Fraser CM.** 2001. Complete genome  
19 sequence of a virulent isolate of *Streptococcus pneumoniae*. *Science.* **293**:498-506.
